# Supplementary material
Source: publisher site journal article supplement (https://www.dovepress.com/article/426849)
Supplement: Supplementary file 1 [file get_supplementary_file.php]

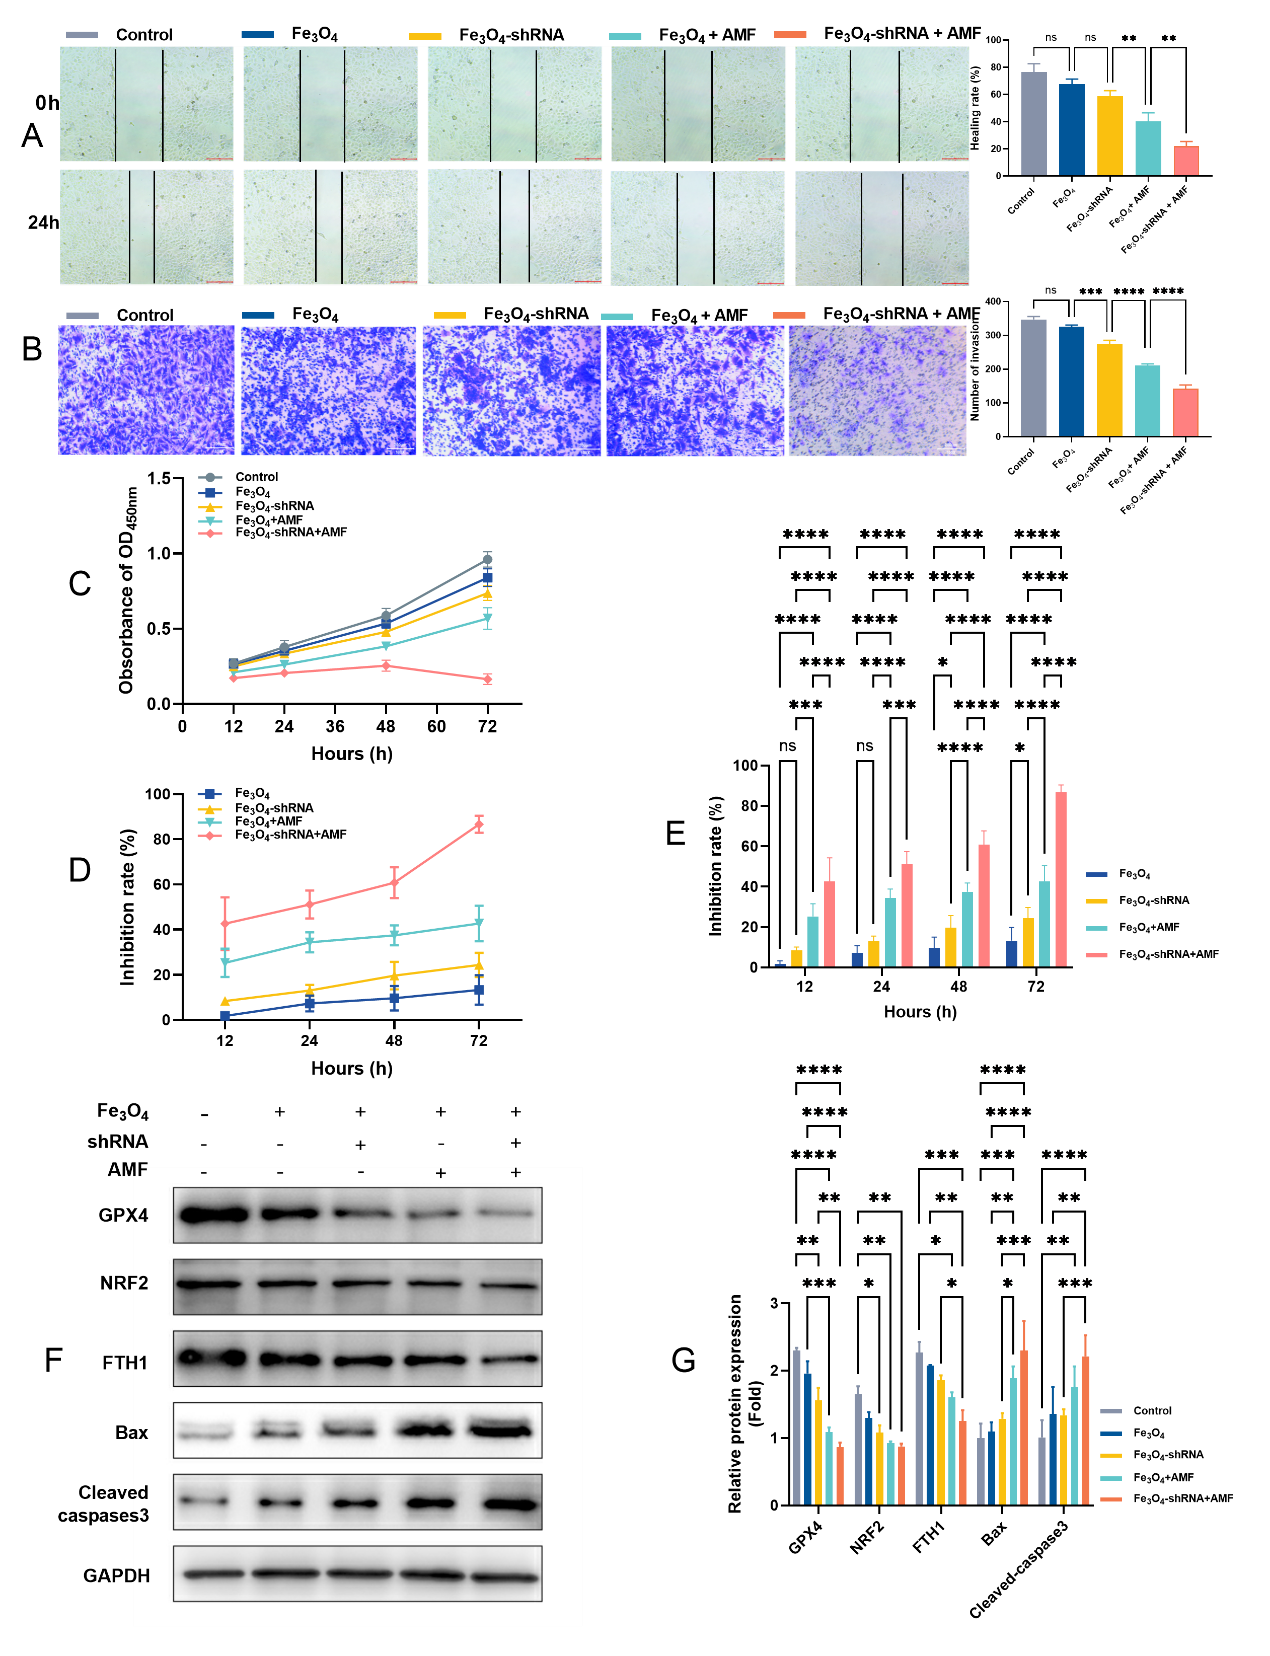


**Figure S1** MUC1-C shRNA@Fe3O4 MNPs suppress the migration, invasion, and proliferation in HCC-70 cell lines. Wound healing (A), Transwell (B), CCK-8 OD450nm (C), and Inhibition rate based on CCK-8 (D-E). The protein bands (F) and quantitative statistical results (G) of Bax, cleaved-caspase3, GPX4, NRF2, and FTH1 of MDA-MB-468 cell lines.

**Tables S1** Hemolysis rate of MUC1-C shRNA@ Fe3O4 MNPs at different concentration ranges (50-400 μg mL-1) and time points (1 h, 2 h, and 24 h), compared with negative and positive controls. N = 3.

|  | **1h** | | | **2h** | | | **24h** | | |
| --- | --- | --- | --- | --- | --- | --- | --- | --- | --- |
| **NC** | 0 | 0 | 0 | 0 | 0 | 0 | 0 | 0 | 0 |
| **50 μg mL-1** | 0.007 | 0.003 | 0.008 | 0.011 | 0.017 | 0.015 | 0.075 | 0.080 | 0.070 |
| **100 μg mL-1** | 0.118 | 0.105 | 0.125 | 0.270 | 0.195 | 0.223 | 0.525 | 0.530 | 0.615 |
| **150 μg mL-1** | 0.238 | 0.224 | 0.259 | 0.534 | 0.553 | 0.605 | 1.115 | 1.256 | 1.300 |
| **200 μg mL-1** | 0.537 | 0.635 | 0.675 | 1.005 | 1.135 | 1.128 | 1.750 | 1.685 | 1.820 |
| **250 μg mL-1** | 0.882 | 1.018 | 0.935 | 1.130 | 1.318 | 1.325 | 2.087 | 1.885 | 2.014 |
| **300 μg mL-1** | 1.115 | 1.175 | 1.235 | 1.650 | 1.725 | 1.805 | 2.500 | 2.625 | 2.225 |
| **350 μg mL-1** | 1.200 | 1.275 | 1.280 | 1.750 | 1.802 | 1.725 | 2.660 | 2.718 | 2.539 |
| **400 μg mL-1** | 1.255 | 1.370 | 1.395 | 1.958 | 2.033 | 2.075 | 2.785 | 2.922 | 2.815 |
| **PC** | 100 | 100 | 100 | 100 | 100 | 100 | 100 | 100 | 100 |

**Tables S2** The tumor weights, and the tumor growth inhibition (TGI) rates of different treatment groups. The synergistic therapeutic effects of gene therapy and magnetic hyperthermia are shown by the combination index (q index), N = 4.

|  | **Control** | **Fe3O4** | **Fe3O4-shRNA** | **Fe3O4+AMF** | **Fe3O4-shRNA+AMF** |
| --- | --- | --- | --- | --- | --- |
| **Tumor weight (g)** | 1.653 | 1.546 | 1.382 | 0.927 | 0.458 |
| 1.604 | 1.680 | 1.228 | 0.880 | 0.339 |
| 1.856 | 1.371 | 1.178 | 0.706 | 0.327 |
| 1.518 | 1.545 | 1.118 | 0.657 | 0.254 |
| **Tumor growth inhibition rates (TGI)** |  | 0.074 | 0.260 | 0.521 | 0.792 |
| **Combination index (q index)** | 1.226 | | | | |

**Tables S3** The relative tumor proliferation rate T/C (%) of different treatment groups at 25th day, N = 4.

| **Relative tumor proliferation rate T/C (%)** | **Fe3O4** | **Fe3O4-shRNA** | **Fe3O4+AMF** | **Fe3O4-shRNA+AMF** |
| --- | --- | --- | --- | --- |
| **25th Day** | 60.286 | 38.718 | 19.238 | 5.636 |
| 51.108 | 28.511 | 15.522 | 6.425 |
| 46.849 | 25.660 | 19.180 | 4.490 |
| 32.002 | 18.389 | 13.146 | 4.499 |
| **Average** | 47.561 | 27.819 | 16.772 | 5.262 |
